# Supplementary material for: Wide but Variable Distribution of a Hypervirulent Campylobacter jejuni Clone in Beef and Dairy Cattle in the United States
Source: PubMed Central journal article supplement (PMC5717212; doi:10.1128/aem.01425-17), 2017-12-01
Supplement: AEM.01425-17_zam999118182s1.pdf [file AEM.01425-17_zam999118182s1.pdf]

Table. S1. Distribution of sequence types and clonal complexes of selected *C. jejuni* isolates from dairy cattle.

| CC  | ST          | No. of isolates | aspA | glnA | gltA | glyA | pgm | tkt | uncA | Percent (%) |
|-----|-------------|-----------------|------|------|------|------|-----|-----|------|-------------|
| 21  | 8           | 102             | 2    | 1    | 1    | 3    | 2   | 1   | 6    | 88          |
| 21  | 21          | 1               | 2    | 1    | 1    | 3    | 2   | 1   | 5    | 0.8         |
| 42  | 42          | 1               | 1    | 2    | 3    | 4    | 5   | 9   | 3    | 0.8         |
| 508 | 132         | 1               | 1    | 6    | 22   | 24   | 12  | 28  | 1    | 0.8         |
| 21  | 262         | 5               | 2    | 1    | 1    | 3    | 2   | 1   | 3    | 4.0         |
| 682 | 682         | 1               | 26   | 2    | 9    | 51   | 8   | 46  | 21   | 0.8         |
| 403 | 933         | 1               | 10   | 1    | 59   | 19   | 10  | 5   | 7    | 0.8         |
| 828 | 1068        | 1               | 33   | 39   | 30   | 78   | 104 | 43  | 17   | 0.8         |
| 61  | 1244        | 1               | 1    | 1    | 2    | 2    | 225 | 3   | 17   | 0.8         |
| 21  | 2876        | 3               | 2    | 2    | 1    | 3    | 2   | 1   | 6    | 2.4         |
| 179 | 3598        | 2               | 1    | 6    | 137  | 176  | 423 | 32  | 3    | 1.6         |
| 685 | <b>8535</b> | 1               | 1    | 1    | 2    | 4    | 2   | 3   | 6    | 0.8         |
| 21  | <b>8536</b> | 2               | 40   | 1    | 1    | 3    | 2   | 1   | 6    | 1.6         |
| 21  | <b>8537</b> | 1               | 2    | 24   | 1    | 3    | 676 | 1   | 6    | 0.8         |
| NA  | <b>8538</b> | 1               | 4    | 6    | 137  | 176  | 40  | 478 | 3    | 0.8         |
| 353 | <b>8539</b> | 1               | 7    | 17   | 234  | 2    | 10  | 3   | 6    | 0.8         |

NA: not assigned to any clonal complex; CC: clonal complex; ST: sequence type; bold numbers: new sequence types identified in this study.
